# Supplementary material
Source: Springer Nature journal article supplement (https://www.springermedizin.de/resource/supplementary/13012_2011_567_MOESM2_ESM.pdf/9630184)
Supplement: MOESM2 [file 9630184]

## LEARNING CURVES

- INFLUENCE OF GAINING CLINICAL EXPERIENCE
- KNOWLEDGE REQUIRED: PROCEDURAL/CLINICAL

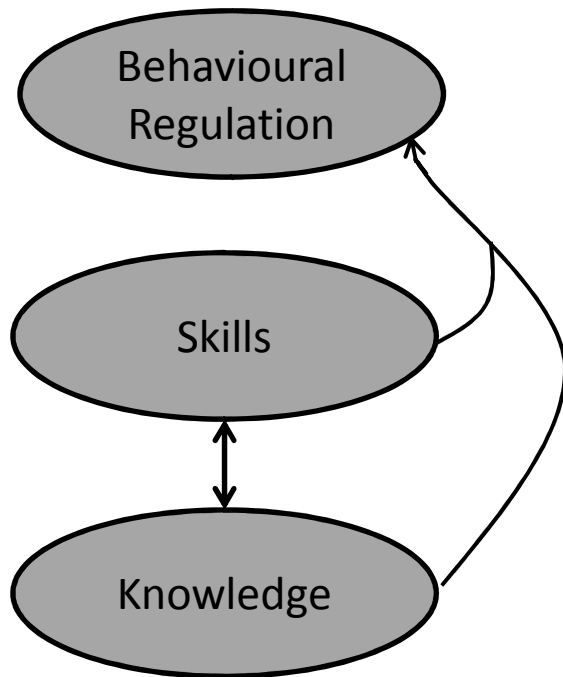

## TAKING INSTRUCTIONS

- INTER-PROFESSIONAL RESPONSIBILITY
- INFLUENCE OF OTHERS
- INFLUENCE OF MEDICAL SPECIALITY

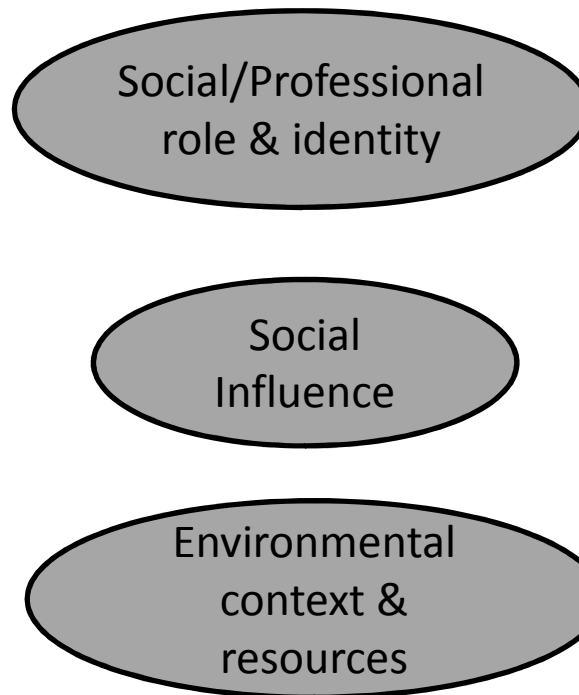

## PATIENT SAFETY

- CONFIDENCE ABOUT PRESCRIBING WITHOUT ERROR
- ERROR OUTCOMES
- SITUATIONS ASSOCIATED WITH ERRORS
- STRATEGIES TO REDUCE ERRORS

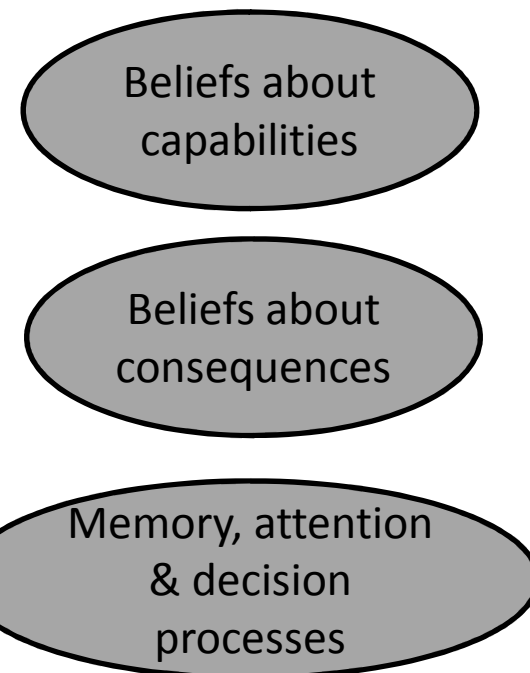

NB: arrows represent inter-relationships
